# Supplementary material for: The enhancement of enzyme cascading via tetrahedral DNA framework modification
Source: Royal Society of Chemistry journal article supplement (doi:10.1039/d2an02097a), 2023-01-01
Supplement: d2an02097a1.pdf [file d2an02097a1.pdf]

## The enhancement of enzyme cascading via tetrahedral DNA framework modification

Haipei Zhao,<sup>a</sup> Mingqiang Li,<sup>a</sup> Shasha Lu,<sup>c</sup> Nan Cao,<sup>a</sup> Xiaolei Zuo,<sup>a,b</sup> Shaopeng Wang,<sup>\*b</sup> and Min Li<sup>\*b</sup>

---

<sup>a</sup>*School of Chemistry and Chemical Engineering, and Zhang Jiang Institute for Advanced Study, Shanghai Jiao Tong University, Shanghai 200240, China. E-mail: zuoxiaolei@sjtu.edu.cn*

<sup>b</sup>*Institute of Molecular Medicine, Shanghai Key Laboratory for Nucleic Acid Chemistry and Nanomedicine, Renji Hospital, School of Medicine, Shanghai Jiao Tong University, Shanghai 200127, China. E-mail: wpsinap@gmail.com, mlisinap@163.com*

<sup>c</sup>*School of Materials Science and Engineering, Suzhou University of Science and Technology, Suzhou 215009, China*

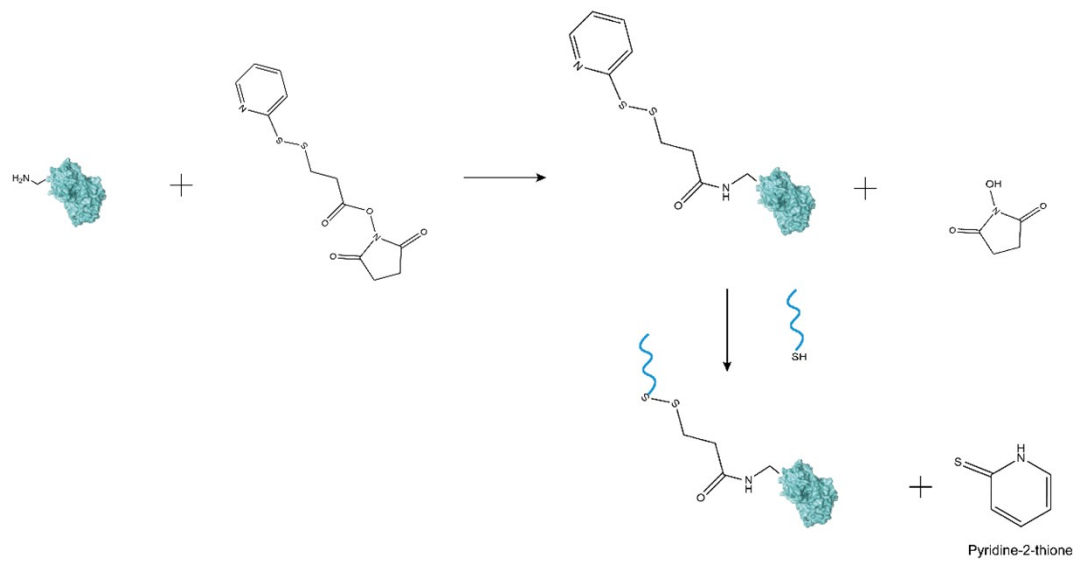

**Fig. S1.** DNA-enzyme conjugation by SPDP crosslinker.

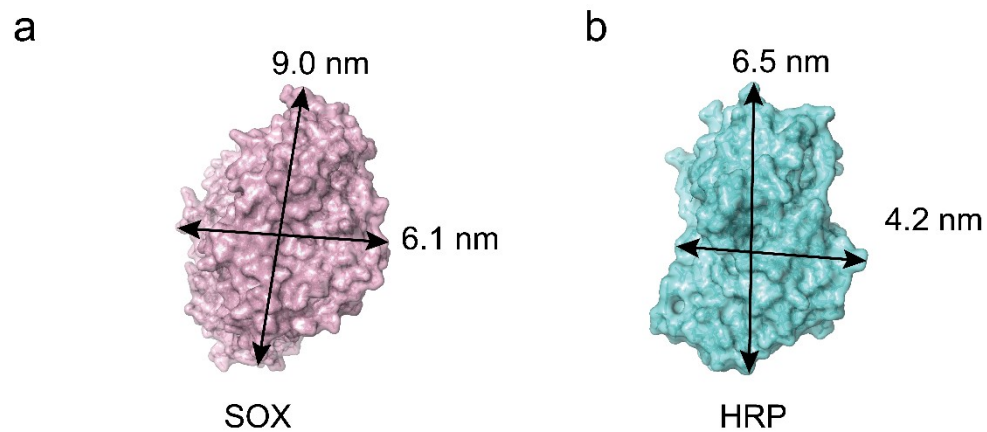

**Fig. S2.** The structures of enzymes. (a) Sarcosine oxidase (SOX, PDB code: 3QSE). (b) Horseradish peroxidase (HRP, PDB code: 1H5A). The structures of enzymes were visualized by PYMOL.

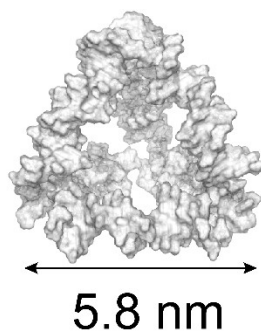

**Fig. S3.** Structure of tetrahedral DNA nanostructure (TDN). The TDN structure was rendered by PYMOL.

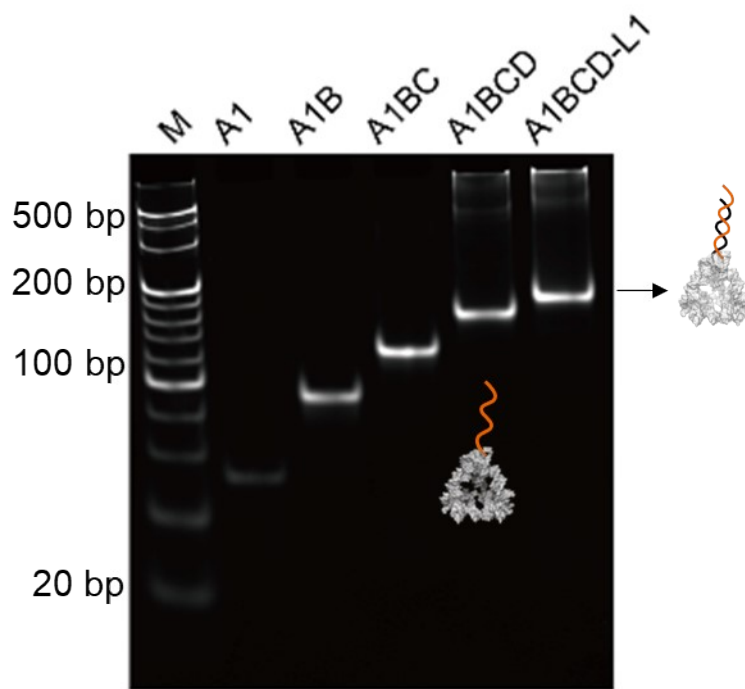

**Fig. S4.** Characterization of TDN1 assembly by PAGE. TDN1 (A1BCD) assembly was shown as a "staircase-like" pattern by adding all four required DNA strands. Lane A1BCD-L1 confirmed the successful hybridization of TDN1 with DNA L1. Lane M: 20 bp marker.

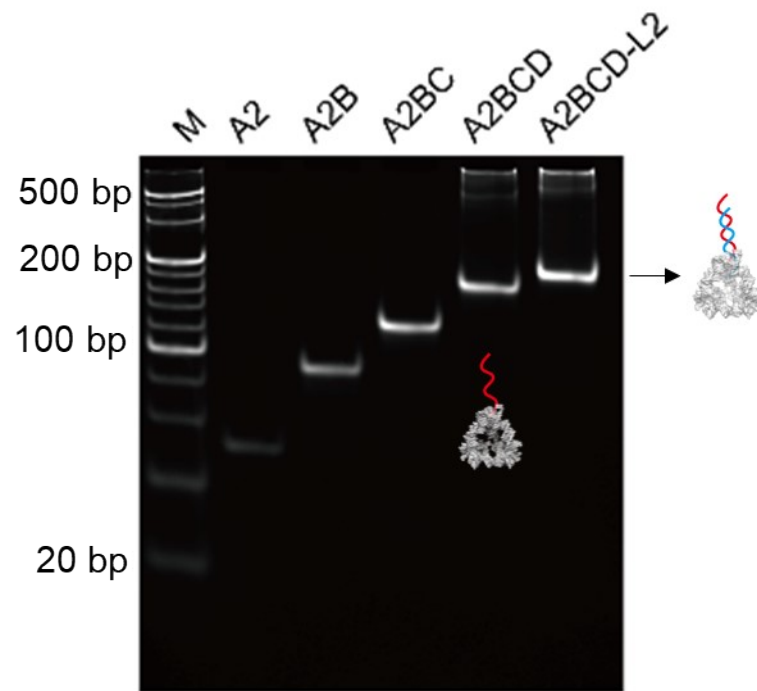

**Fig. S5.** Characterization of TDN2 assembly by PAGE. Lane A2BCD indicated the formation of TDN2 and lane A1BCD-L2 confirmed the successful hybridization of TDN2 with DNA L2. Lane M: 20 bp marker.

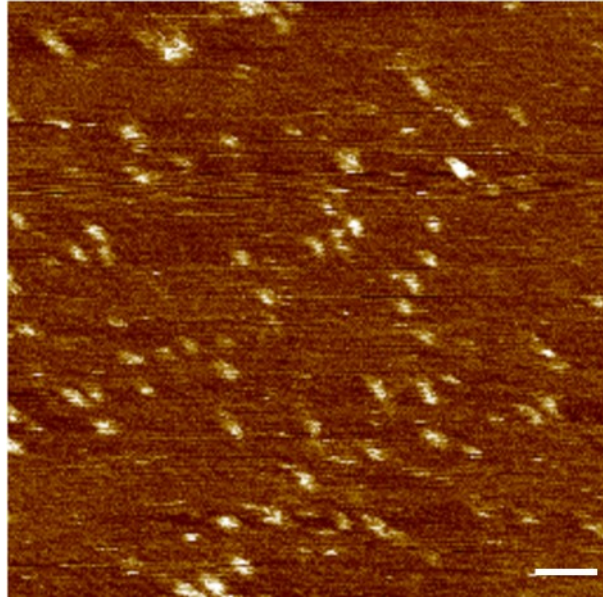

**Fig. S6.** The AFM image of the TDNs. Scale bar: 100 nm.

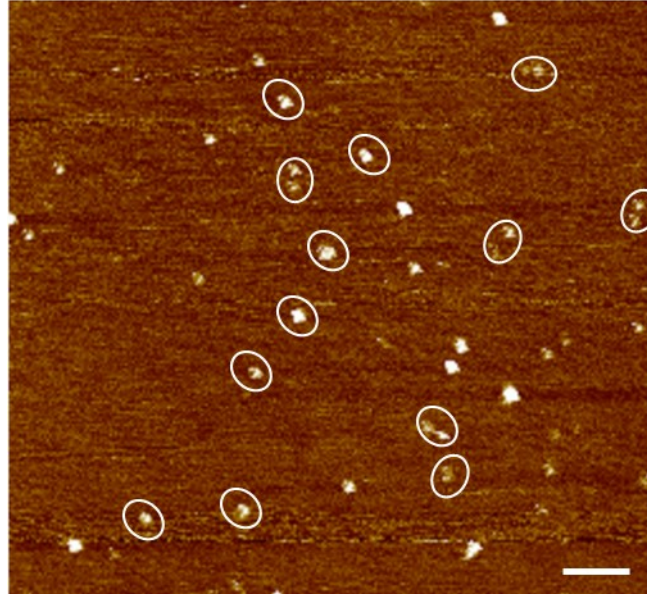

**Fig. S7.** The AFM image of the TDN1-SOX. Scale bar: 200 nm. White ellipses indicate the TDN1-SOX conjugations.



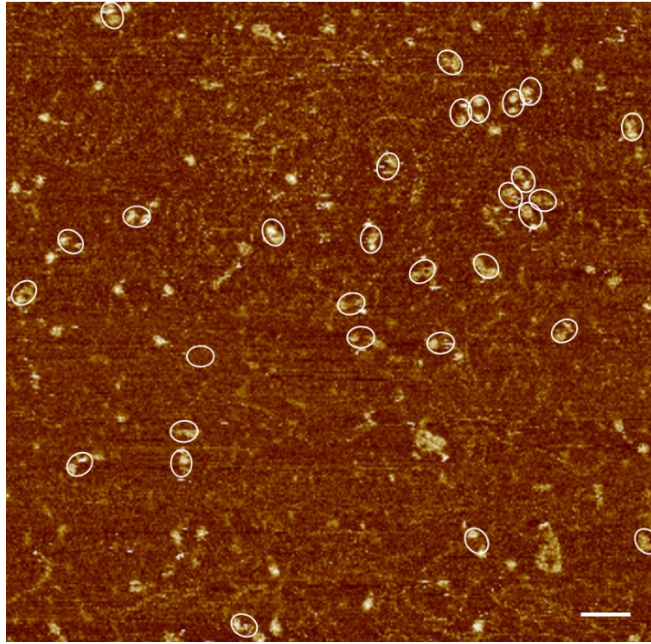

**Fig. S8.** The AFM image of the TDN2-HRP. Scale bar: 50 nm. White ellipses indicate the TDN2-HRP conjugations.

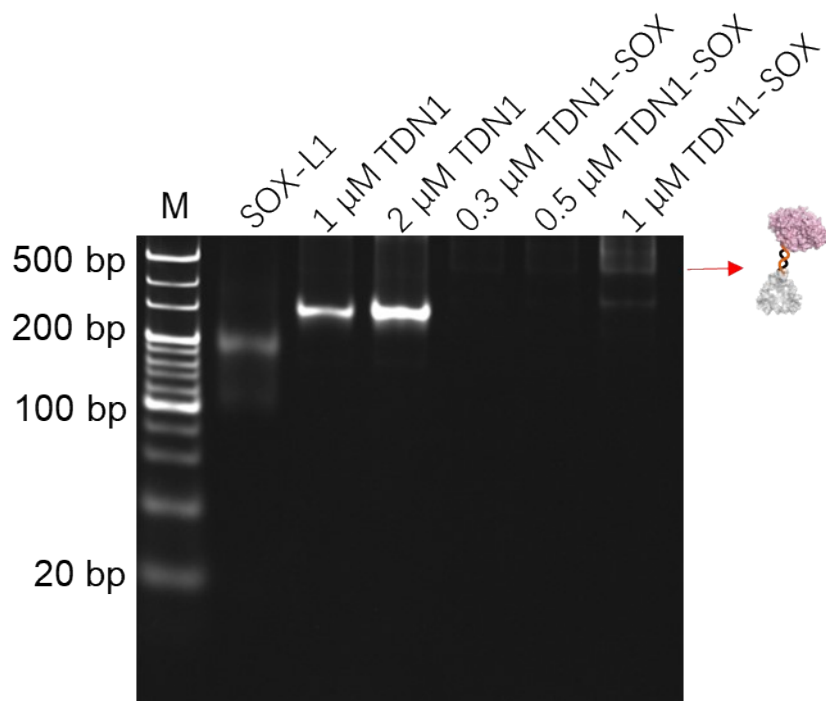

**Fig. S9.** Characterization of the formation of TDN1-SOX by gel electrophoresis mobility shift assay (EMSA). Lane M: 20 bp marker. Immobilization of L1-SOX on the vertex of TDN1 decreased its migration rate significantly.

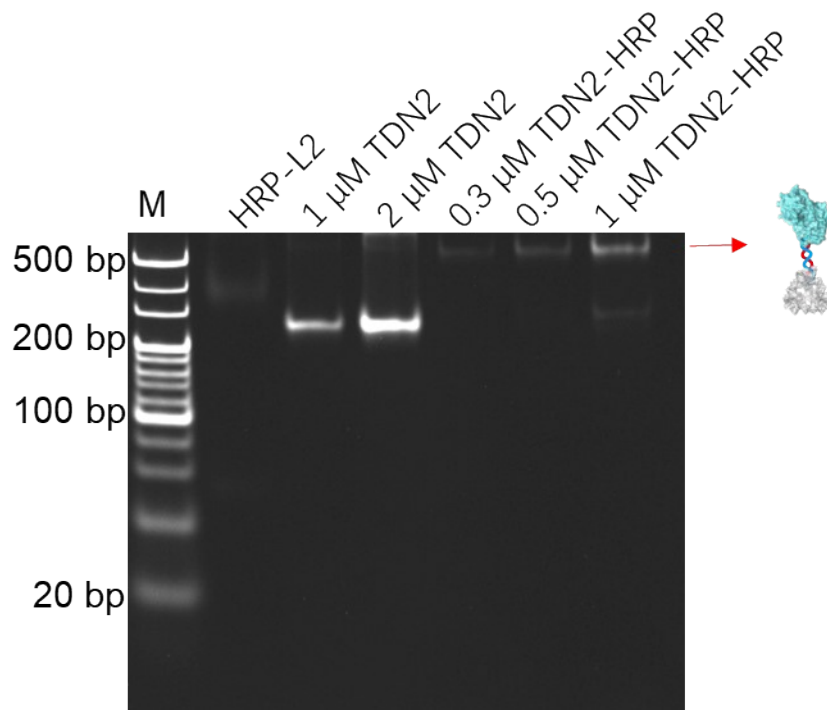

**Fig. S10.** Characterization of the formation of TDN2-HRP by gel electrophoresis mobility shift assay (EMSA). Lane M: 20 bp marker. Immobilization of L2-HRP on the vertex of TDN2 decreased its migration rate significantly.

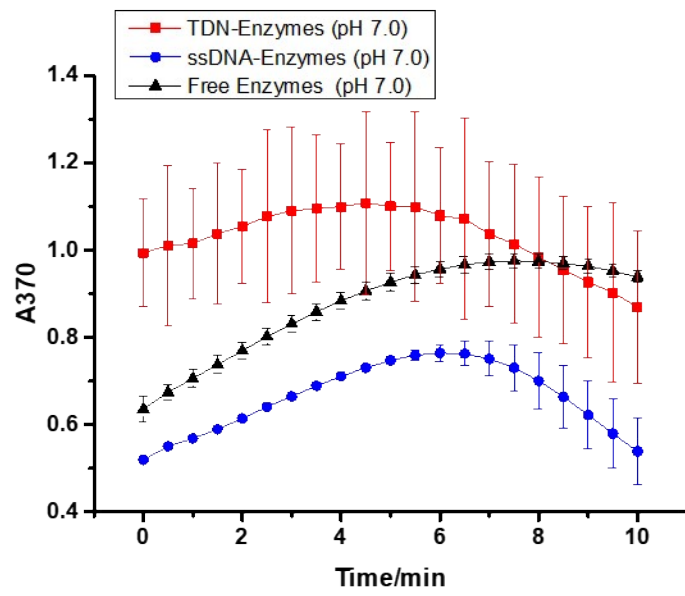

**Fig. S11.** The kinetics curves of the TDN-enzymes, ssDNA-enzymes and free enzymes (pH 7.0).

**Table S1 DNA sequence used in this work:**

| name     | DNA(5'→3')                                                                                     |
|----------|------------------------------------------------------------------------------------------------|
| A        | ACATTCCTAAGTCTGAAACATTACAGCTTGCTACACGAGAAGAGCC<br>GCCATAGTAAAAAAAAAAAA                         |
| A1(A-L3) | ACATTCCTAAGTCTGAAACATTACAGCTTGCTACACGAGAAGAGCC<br>GCCATAGTAAAAAAAAAAAAAAAAAAAAAAAAAAAAAAAAAAAA |
| A2(A-L4) | ACATTCCTAAGTCTGAAACATTACAGCTTGCTACACGAGAAGAGCC<br>GCCATAGTAAAAAAAAAAAAACCACCACCACCACCA         |
| B        | SH-<br>TATCACCAGGCAGTTGACAGTGTAGCAAGCTGTAATAGATGCGAG<br>GGTCCAATAC                             |
| C        | SH-<br>TCAACTGCCTGGTGATAAACGACACTACGTGGGAATCTACTATGG<br>CGGCTCTTC                              |
| D        | SH-<br>TTCAGACTTAGGAATGTGCTTCCCACGTAGTGTCGTTTGTATTGGAC<br>CCTCGCAT                             |
| L1       | TTTTTTTTTTTTTTTTTTTT-SH                                                                        |
| L2       | TTGGTGGTGGTGGTGGTGGT-SH                                                                        |
| L3       | AAAAAAAAAAAAAAAAAAAAA                                                                          |
| L4       | AACCACCACCACCACCACCA                                                                           |
| L3'      | SH-AAAAAAAAAAAAAAAAAAAAA                                                                       |
| L4'      | SH-AACCACCACCACCACCACCA                                                                        |
